# Supplementary material
Source: MDPI journal article supplement (https://www.mdpi.com/2073-4441/16/6/913)
Supplement: s1 [file s1]

Archive with 2 entries (2 files):
- Table S1 Interview summary.pdf
- Table S2 Changes in Coastal Consumption Patterns.pdf
