# Supplementary material
Source: MDPI journal article supplement (https://www.mdpi.com/2073-4441/16/6/913)
Supplement: s1 [file s1 › Table S2 Changes in Coastal Consumption Patterns.pdf]

Table S2 Changes in Coastal Consumption Patterns

| Consumption behavior<br>Space (2023) | Before 1978                                                                                                                                                                                                                                       | the first decade (1978-1988)                                                                                                                                                                                                    | the second decade (1988-1998)                                                                                                                                                                                                | the third decade (1998-2010)                                                                                                          | the third decade (2010-2020)                                                                                                                                                                                                         | Consumer Space (2023)                                                  | Consumption behavior (2023)                                                                                                                              | Money Flow (2023)                                                   |
|--------------------------------------|---------------------------------------------------------------------------------------------------------------------------------------------------------------------------------------------------------------------------------------------------|---------------------------------------------------------------------------------------------------------------------------------------------------------------------------------------------------------------------------------|------------------------------------------------------------------------------------------------------------------------------------------------------------------------------------------------------------------------------|---------------------------------------------------------------------------------------------------------------------------------------|--------------------------------------------------------------------------------------------------------------------------------------------------------------------------------------------------------------------------------------|------------------------------------------------------------------------|----------------------------------------------------------------------------------------------------------------------------------------------------------|---------------------------------------------------------------------|
| Ten mile Bridge                      | Gaoji Bridge and Jixing Bridge connect the land at both ends of the peninsula, and there is no land reclamation yet, only Dragon King's Palace pier is a landmark, and the consumption behavior is the sale and purchase of fish caught offshore. | Reclamation and land reclamation began based on the demand for agriculture and aquatic products. Dragon King's Palace pier is still a landmark, and consumption behavior is also the sale and purchase of fish caught offshore. | Coastal management has begun, and the work of clearing the sea area for breeding has been carried out. The trading of fish caught in the offshore has decreased, and the function of Dragon King's Palace pier has weakened. | The coastal zone of Jimei Peninsula began to clear the sea area for breeding, and the function of Dragon King's Palace pier was lost. | The coastal zone of the Jimei Peninsula has completed the work of clearing the sea area for breeding. The Dragon King's Palace is the edge landscape of the "Shi li Chang Di", which is a tourist attraction of the Jimei Peninsula. | Parking Lot (Car and Shared bikes)                                     | Parking and rent bikes                                                                                                                                   | E-commerce platforms: Meituan, Alibaba and Didi; Outsourcing vendor |
|                                      |                                                                                                                                                                                                                                                   |                                                                                                                                                                                                                                 |                                                                                                                                                                                                                              |                                                                                                                                       |                                                                                                                                                                                                                                      | Vendor Point                                                           | Buy food and beverage.                                                                                                                                   | Outsourcing vendor<br>Travel Company                                |
|                                      |                                                                                                                                                                                                                                                   |                                                                                                                                                                                                                                 |                                                                                                                                                                                                                              |                                                                                                                                       |                                                                                                                                                                                                                                      | Car Trunk Bazaar                                                       | Buy food, beverage, Cultural and creative products, and rent power bank.                                                                                 | Car Owner<br>Travel Company                                         |
|                                      |                                                                                                                                                                                                                                                   |                                                                                                                                                                                                                                 |                                                                                                                                                                                                                              |                                                                                                                                       |                                                                                                                                                                                                                                      | Car Trunk Bazaar ( Spontaneously formed )                              | Buy beverage, food, flowers, etc.                                                                                                                        | Outsourcing vendor                                                  |
|                                      |                                                                                                                                                                                                                                                   |                                                                                                                                                                                                                                 |                                                                                                                                                                                                                              |                                                                                                                                       |                                                                                                                                                                                                                                      | Open-air concert (offline + online live broadcast reward mode)         | Online tipping behavior.                                                                                                                                 | Performer<br>Internet celebrity                                     |
|                                      |                                                                                                                                                                                                                                                   |                                                                                                                                                                                                                                 |                                                                                                                                                                                                                              |                                                                                                                                       |                                                                                                                                                                                                                                      | Chang Di Love House (small retail store)                               | Buy beverage, and food, rent power banks, etc.                                                                                                           | Businessman+Travel<br>Company                                       |
|                                      |                                                                                                                                                                                                                                                   |                                                                                                                                                                                                                                 |                                                                                                                                                                                                                              |                                                                                                                                       |                                                                                                                                                                                                                                      | Fishing Area                                                           | Buy beverage, and food, rent power banks, etc.                                                                                                           | Free venue + bring your own fishing gear                            |
| Dragon boat pool                     | Dragon Boat Racing Venue                                                                                                                                                                                                                          | Dragon Boat Racing Venue                                                                                                                                                                                                        | Dragon Boat Racing Venue ; Tourist Attraction                                                                                                                                                                                | Dragon Boat Racing Venue ; Tourist Attraction                                                                                         | Dragon Boat Racing Venue ; Tourist Attraction                                                                                                                                                                                        | Vendors occupy the space inside the dragon boat pond to set up stalls. | Fruits, daily necessities (hats, slippers, sunscreen, rubber bands, sunglasses), Xiamen specialties, beverage (orange juice, milk tea, etc.), food, etc. | Vendor                                                              |

| Consumption behavior<br>Space<br>(2023)  | Before 1978                                                                                                                            | the first decade<br>(1978-1988)                                                                                                          | the second decade<br>(1988-1998)                                                                                                        | the third decade<br>(1998-2010)                                                                                                        | the third decade<br>(2010-2020)                                                                                                              | Consumer Space<br>(2023)                                                                                                                                        | Consumption behavior<br>(2023)                                                                                                                                                                                                                                   | Money Flow<br>(2023) |
|------------------------------------------|----------------------------------------------------------------------------------------------------------------------------------------|------------------------------------------------------------------------------------------------------------------------------------------|-----------------------------------------------------------------------------------------------------------------------------------------|----------------------------------------------------------------------------------------------------------------------------------------|----------------------------------------------------------------------------------------------------------------------------------------------|-----------------------------------------------------------------------------------------------------------------------------------------------------------------|------------------------------------------------------------------------------------------------------------------------------------------------------------------------------------------------------------------------------------------------------------------|----------------------|
| Jiageng Park                             | Tidal flat farming;Tao Xiaohai(Foraging behavior in the intertidal zone); crab fishing; oyster farming                                 | Tao Xiaohai(Foraging behavior in the intertidal zone) ; Crab fishing                                                                     | Tan Kah Kee Memorial Site and Tourist Attraction                                                                                        | Tan Kah Kee Memorial Site and Tourist Attraction                                                                                       | Tan Kah Kee Memorial Site and Tourist Attraction                                                                                             | Consumption at Stores in Scenic Spots                                                                                                                           | Beverages (coffee shop, milk tea etc.), Retail Store, Ticket Booking Shop, Restaurant (Minnan cuisine, sand tea noodles, etc.), Specialty Shop, Scenic Spot Tourist Car, Tea                                                                                     | Vendor               |
| Jiageng Memorial Hall                    |                                                                                                                                        |                                                                                                                                          |                                                                                                                                         |                                                                                                                                        |                                                                                                                                              |                                                                                                                                                                 |                                                                                                                                                                                                                                                                  |                      |
| Ao-Yuan Garden                           | Praising the greatness of the Communist Party of China; Mr. Tan Kah Kee's gravesite                                                    | Praising the greatness of the Communist Party of China; Mr. Tan Kah Kee's gravesite                                                      | Praising the greatness of the Communist Party of China; Mr. Tan Kah Kee's gravesite ; Tan Kah Kee Memorial Site and Tourist Attraction  | Praising the greatness of the Communist Party of China; Mr. Tan Kah Kee's gravesite ; Tan Kah Kee Memorial Site and Tourist Attraction | Praising the greatness of the Communist Party of China; Mr. Tan Kah Kee's gravesite ; Tan Kah Kee Memorial Site and Tourist Attraction       |                                                                                                                                                                 |                                                                                                                                                                                                                                                                  |                      |
| North Bay Coastline                      | Tidal flat farming;Tao Xiaohai(Foraging behavior in the intertidal zone); crab fishing; oyster farming                                 | Tidal flat farming;Tao Xiaohai(Foraging behavior in the intertidal zone); crab fishing; oyster farming                                   | Building villa area                                                                                                                     | Villa area; Hotel                                                                                                                      | Villa area; Hotel                                                                                                                            | North Bay Camping Space                                                                                                                                         | Food, beverage, Barbecue, Open-air Catering Service (reservation required one day in advance)                                                                                                                                                                    | Vendor               |
| Jimei Dashe settlement                   | Fishing Village;Fishing Gear Repair;Selling forage catches<br>Ferry bow sells processed products (dried fish, local specialties, etc.) | Fishing Village; Fishing Gear Repair;Selling forage catches;<br>Ferry bow sells processed products (dried fish, local specialties, etc.) | Fishing Village;Fishing Gear Repair;Selling forage catches;<br>Ferry bow sells processed products (dried fish, local specialties, etc.) | Art and Creative Village;Tourist Attraction;<br>Ferry bow sells processed products (dried fish, local specialties, etc.)               | Art and Creative Village;Tourist Attraction;<br>Except for the local specialties in their own stores, all other vendors were asked to leave. | Inside the Space of Jimei Dashe (Dashe Road, the morning market next to the ancestral hall and Cendong Road, the market surrounding Shigu Road, and Jicen Road) | Jimei Dashe meets basic food, housing and transportation needs, and you can purchase all kinds of needed items.Various restaurants, beverage shops, art and cultural creative shops, daily groceries and various small vendors also provide accommodation space. | Vendor               |
| East coast of Xinglin Bay Landscape Belt | Rice Fields, salt drying field; Aquaculture; Reservoirs; Natural nursery                                                               | Aquaculture; Reservoir                                                                                                                   | Aquaculture; Reservoir                                                                                                                  | Aquaculture; Reservoir; Residential area                                                                                               | Reservoir; Residential area; Boardwalk above the sea; Tourist Attraction                                                                     | boardwalk above the sea (for cycling and jogging)                                                                                                               | beverage; Bicycles (two-seater and four-seater sizes)                                                                                                                                                                                                            | outsourcing vendor   |
